# Supplementary material for: Acquired convergence of hormone signaling in breast cancer: ER and PR transition from functionally distinct in normal breast to predictors of metastatic disease
Source: PubMed Central journal article supplement (PMC4226711; doi:10.18632/oncotarget.2354), 2014-08-16
Supplement: oncotarget-05-8651-s001.pdf [file oncotarget-05-8651-s001.pdf]

# Acquired convergence of hormone signaling in breast cancer: ER and PR transition from functionally distinct in normal breast to predictors of metastatic disease

## Supplementary Material

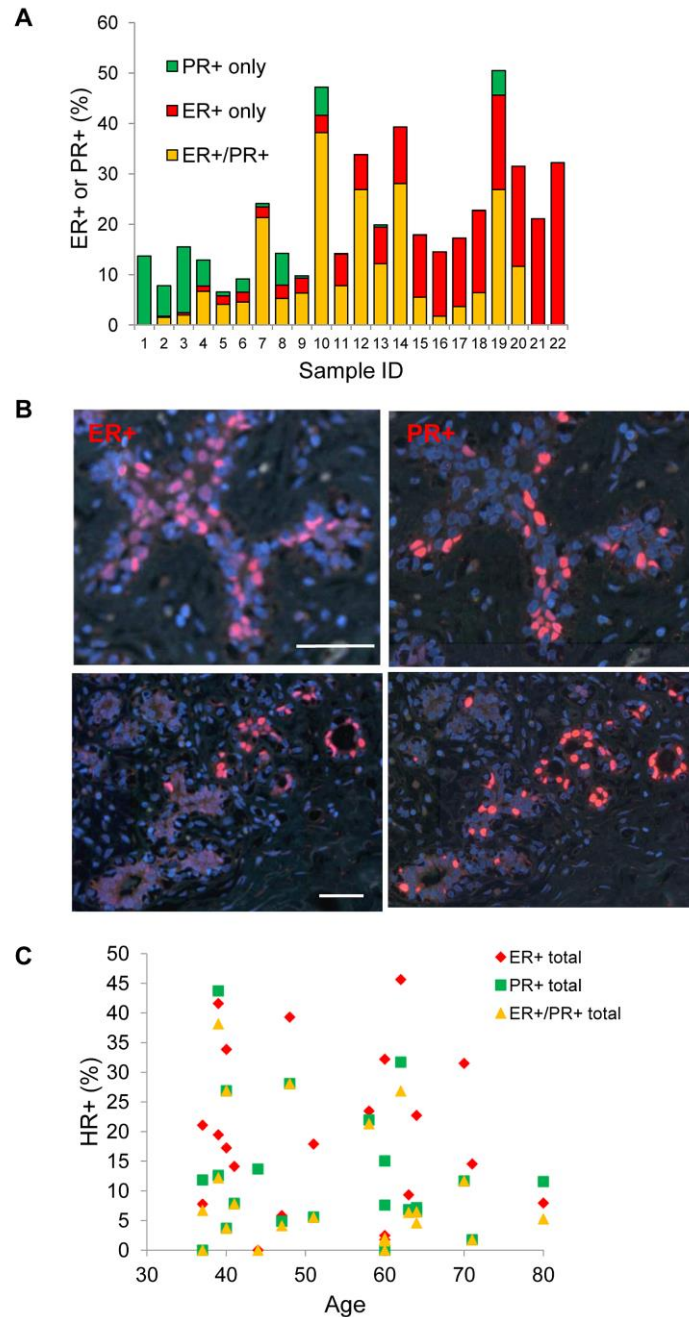

**Supplementary Figure 1:** **A** Number of cell nuclei positive for ER only, PR only, or both were quantitated, and expressed as the percentage of total epithelial cell nuclei counted. **B** Mirror sections of normal human breast tissue stained using only ER (left) or only PR (right). Scale bars represent 50  $\mu$ m. **C** Scatterplot depicting the relationship between hormone receptor status and age.

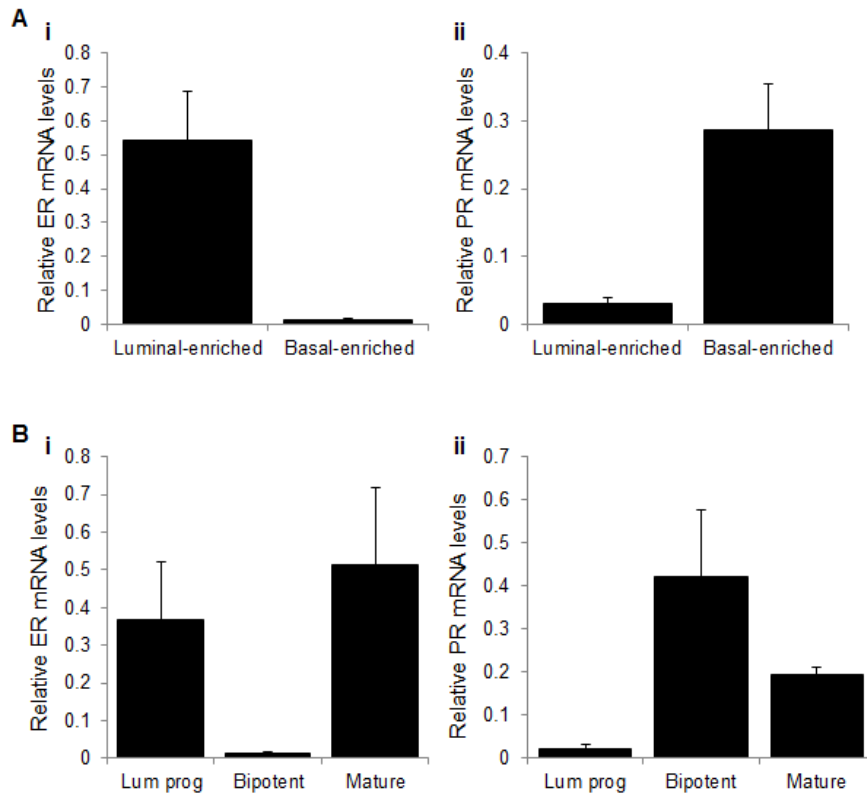

**Supplementary Figure 2:** **A** Relative mRNA levels of ER (i) and PR (ii) were normalised to TBP in luminal-enriched and basal-enriched subpopulations sorted on the basis of EpCAM and CD49f markers. **B** Relative mRNA levels of ER (i) and PR (ii) in subpopulations fractionated on the basis of luminal progenitor (CD49f+MUC1+CD133+), bipotent progenitor (CD49f+CD10+Thy1+) and mature (CD49f-) lineage markers. Graphs represent the mean + SE from experiments using tissue from 3 different patients.

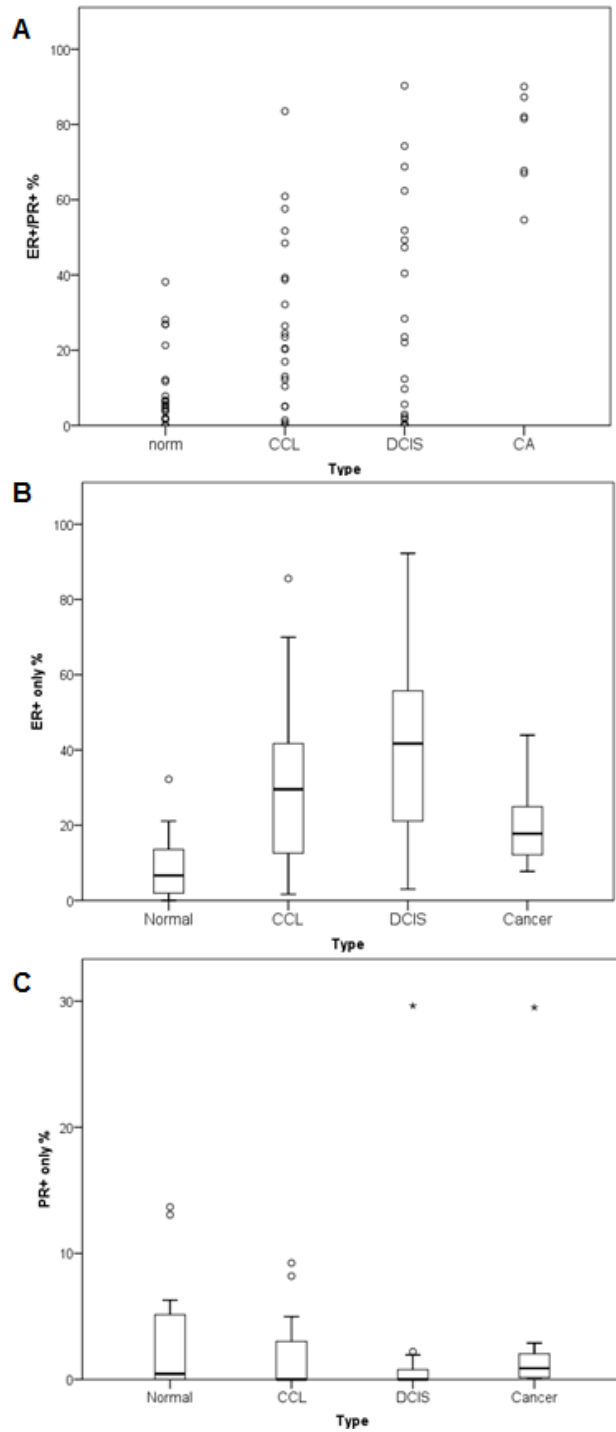

**Supplementary Figure 3: A** Scatterplot of the proportion of cell nuclei positive for both ER and PR across a spectrum of normal (norm), CCL, DCIS and cancer (CA) samples. **B** and **C**

Boxplots of the proportions of **(B)** ER+ or **(C)** PR+ only expressing cells across the sample cohort.

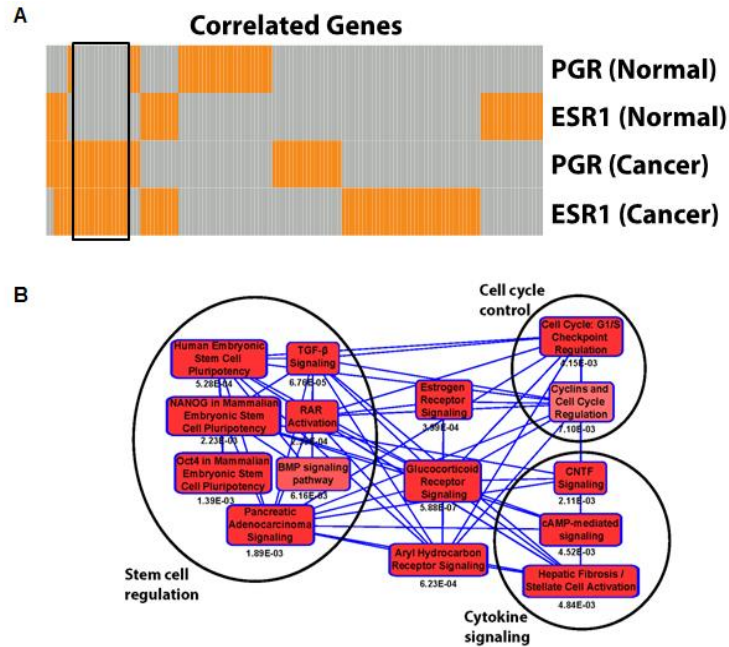

**Supplementary Figure 4: A** Heatmap representation of the set of 141 genes found to be correlated (Spearman Rank Correlation  $\geq 0.5$ ) with either ER (ESR1) or PR (PGR) in cancer or normal samples based on expression profiling of 48 NRs and 283 CoRs on TLDAs. The box outlines genes which are highly correlated with both ER and PR in cancer, but not in normal breast. **B** Ingenuity overlapping pathways analysis identified over-representation of 3 functional pathways.

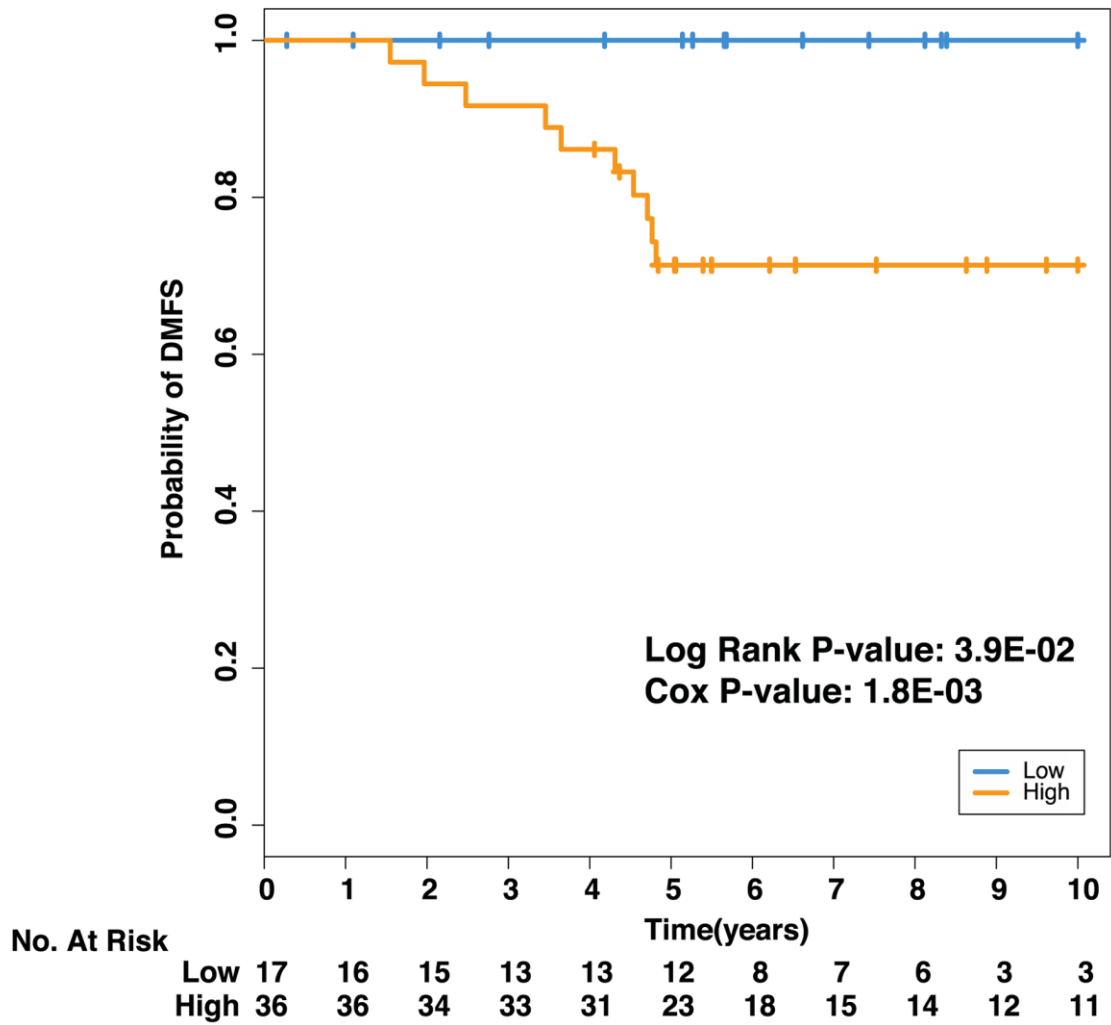

**Supplementary Figure 5:** Kaplan Meier plot of probability of survival where patient samples from tumors expressing high PR and low ER were stratified into low or high risk groups.

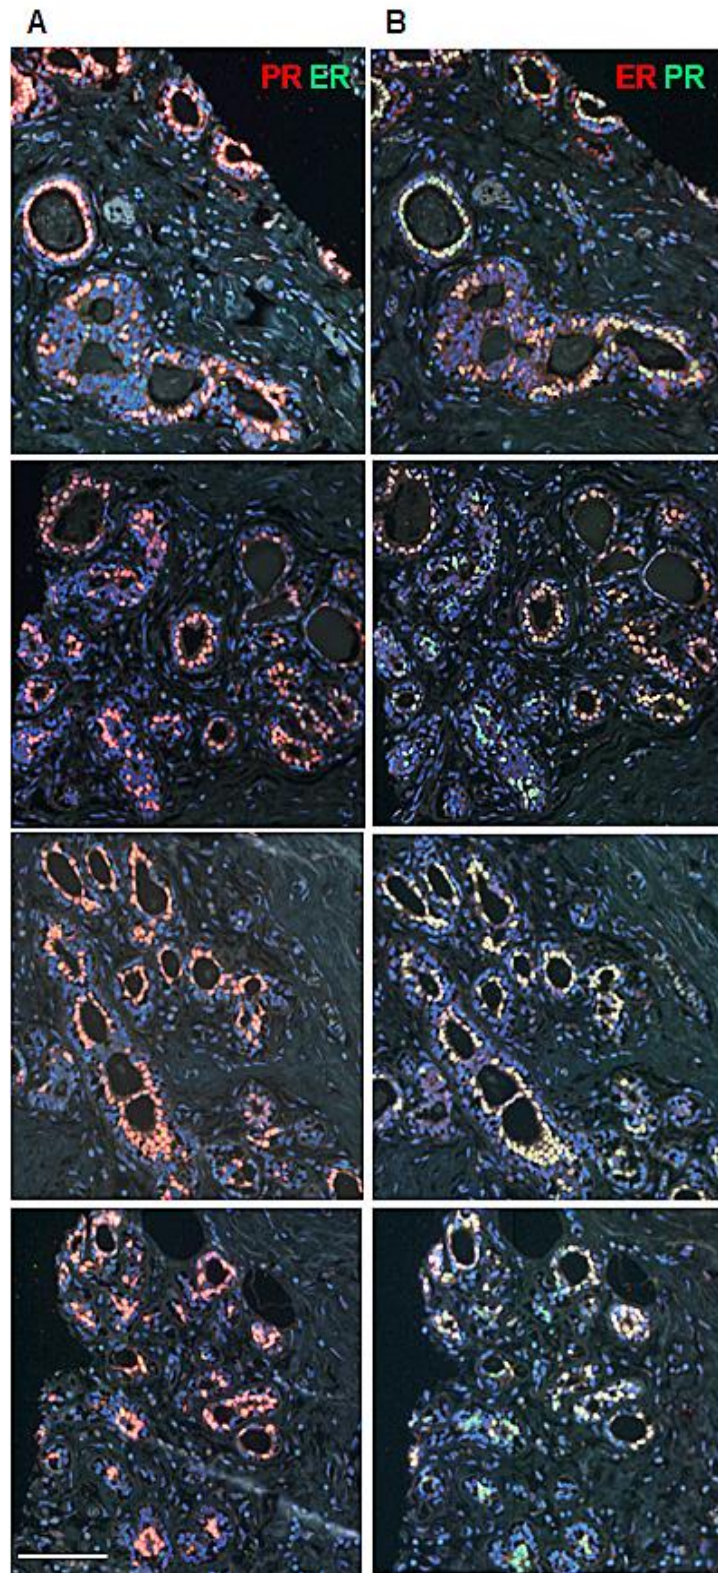

**Supplementary Figure 6:** Representative images of two sets of mirror sections of normal human breast tissue stained sequentially using (A) PR (red) then ER (green), or (B) ER (red) then PR (green).

**Supplementary Table 1:** PR binding sites close to the promoters of PR correlated genes.

| <b>Chr</b> | <b>Peak Score</b> | <b>Distance to TSS</b> | <b>Nearest PromoterID</b> | <b>Entrez ID</b> | <b>Nearest Unigene</b> | <b>Gene Name</b> |
|------------|-------------------|------------------------|---------------------------|------------------|------------------------|------------------|
| chr6       | 64.87             | -74105                 | NM_001122742              | 2099             | Hs.208124              | ESR1             |
| chr6       | 53.66             | -56739                 | NM_001122742              | 2099             | Hs.208124              | ESR1             |
| chr6       | 102.84            | -41929                 | NM_001122742              | 2099             | Hs.208124              | ESR1             |
| chr6       | 547.49            | -27437                 | NM_001122742              | 2099             | Hs.208124              | ESR1             |
| chr6       | 1573.14           | -23186                 | NM_001122742              | 2099             | Hs.208124              | ESR1             |
| chr6       | 89.39             | -12955                 | NM_001122742              | 2099             | Hs.208124              | ESR1             |
| chr6       | 183.12            | -10822                 | NM_001122742              | 2099             | Hs.208124              | ESR1             |
| chr6       | 735.43            | -7279                  | NM_001122742              | 2099             | Hs.208124              | ESR1             |
| chr6       | 591.64            | 6391                   | NM_001122742              | 2099             | Hs.208124              | ESR1             |
| chr6       | 54.84             | -43624                 | NM_001122741              | 2099             | Hs.208124              | ESR1             |
| chr6       | 165.26            | 7329                   | NM_000125                 | 2099             | Hs.208124              | ESR1             |
| chr6       | 242.28            | 61688                  | NM_000125                 | 2099             | Hs.208124              | ESR1             |
| chr6       | 75.53             | 86570                  | NM_000125                 | 2099             | Hs.208124              | ESR1             |
| chr6       | 55.62             | 93549                  | NM_000125                 | 2099             | Hs.208124              | ESR1             |
| chr4       | 105.76            | 20770                  | NM_001185009              | 6047             | Hs.740360              | RNF4             |
| chr21      | 384.81            | 83391                  | NM_003489                 | 8204             | Hs.155017              | NRIP1            |
| chr21      | 109.96            | 58004                  | NM_003489                 | 8204             | Hs.155017              | NRIP1            |
| chr17      | 114.13            | 473                    | NM_213662                 | 6774             | Hs.463059              | STAT3            |
| chr12      | 55.71             | -6984                  | NM_001202233              | 3164             | Hs.670088              | NR4A1            |
| chr15      | 382.45            | -34524                 | NM_005902                 | 4088             | Hs.727986              | SMAD3            |
| chr15      | 51.32             | -2337                  | NM_005902                 | 4088             | Hs.727986              | SMAD3            |
| chr15      | 456.48            | -11368                 | NM_001145104              | 4088             | Hs.727986              | SMAD3            |
| chr15      | 776.97            | 8758                   | NM_001145104              | 4088             | Hs.727986              | SMAD3            |
| chr15      | 192.56            | 19571                  | NM_001145104              | 4088             | Hs.727986              | SMAD3            |
| chr1       | 105.51            | -492                   | NM_017761                 | 55629            | Hs.716935              | PNRC2            |

**Supplementary Table 2:** Genes highly correlated with both ER and PR in breast cancer samples. Genes indicated with an asterisk contain both ER and PR binding sites within their promoters.

| EntrezGene ID | EntrezGene Symbol | Gene Name                                              | Gene Function (UniProtKB/Swiss-Prot)                                                                                                                |
|---------------|-------------------|--------------------------------------------------------|-----------------------------------------------------------------------------------------------------------------------------------------------------|
| 26166         | RGS22             | Regulator of G-protein signalling 22                   | Inhibits signal transduction by increasing the GTPase activity of G protein alpha subunits thereby driving them into their inactive GDP-bound form  |
| 18            | ABAT*             | 4-aminobutyrate aminotransferase                       | Catalyzes the conversion of gamma-aminobutyrate and L-beta-aminoisobutyrate to succinate semialdehyde and methylmalonate semialdehyde, respectively |
| 9             | NAT1*             | N-acetyltransferase 1 (arylamine N-acetyltransferase)  | Participates in the detoxification of many hydrazine and arylamine drugs                                                                            |
| 83450         | LRRC48*           | leucine rich repeat containing 48                      | Unknown                                                                                                                                             |
| 26018         | LRIG1*            | leucine-rich repeats and immunoglobulin-like domains 1 | Acts as a feedback negative regulator of signaling by receptor tyrosine kinases                                                                     |
| 55259         | CASC1             | cancer susceptibility candidate 1                      | Unknown                                                                                                                                             |
| 4137          | MAPT              | microtubule-associated protein tau                     | Promotes microtubule assembly and stability, and might be involved in the establishment and maintenance of neuronal polarity                        |
| 1952          | CELSR2            | cadherin, EGF LAG seven-pass G-type receptor 2         | Receptor that may have an important role in cell/cell signaling during nervous system formation                                                     |
| 138162        | C9orf116*         | chromosome 9 open reading frame 116                    | Unknown                                                                                                                                             |
| 3572          | IL6ST*            | interleukin 6 signal transducer/gp130                  | Binds to IL6/IL6R ( $\alpha$ chain) complex, resulting in the formation of high-affinity IL6 binding sites, and transduces the signal               |
| 80129         | CCDC170*          | coiled-coil domain containing 170                      | Unknown                                                                                                                                             |
| 57758         | SCUBE2            | signal peptide, CUB domain, EGF-like 2                 | Unknown                                                                                                                                             |
| 203328        | SUSD3*            | sushi domain containing 3                              | Unknown                                                                                                                                             |
| 285386        | TPRG1*            | tumor protein p63 regulated 1                          | Unknown                                                                                                                                             |



|        |           |                                                                                           |                                                                                                                    |
|--------|-----------|-------------------------------------------------------------------------------------------|--------------------------------------------------------------------------------------------------------------------|
| 256394 | SERPINA11 | serpin peptidase inhibitor, clade A ( $\alpha$ -1 antiproteinase, antitrypsin), member 11 | Unknown                                                                                                            |
| 6478   | SIAH2*    | siah E3 ubiquitin protein ligase 2                                                        | E3 ubiquitin-protein ligase that mediates ubiquitination and subsequent proteasomal degradation of target proteins |
| 80127  | C14orf45  | coiled-coil domain containing 176                                                         | Unknown                                                                                                            |
| 51364  | ZMYND10   | zinc finger, MYND-type containing 10                                                      | Unknown                                                                                                            |

**Supplementary Table 3:** Binding sites of ER and PR in 18 gene signature. Genes in red indicate overlapping binding sites of ER and PR.

| <i>Entrez Gene ID</i> | <i>Entrez Gene Symbol</i> | <i>PR peak Distance to TSS (kb)</i>                           | <i>ER peak Distance to TSS (kb)</i>                                                            |
|-----------------------|---------------------------|---------------------------------------------------------------|------------------------------------------------------------------------------------------------|
| 18                    | <b>ABAT</b>               | -8.6; -1.7; 3.8; 11.6                                         | -16.0; -0.4; 1.4; 2.6; 4.4; 6.1; 6.7; 8.5; 11.5; 18.1                                          |
| 80127                 | C14orf45                  |                                                               |                                                                                                |
| 138162                | <b>C9orf116</b>           | 3.4                                                           | 0.1; 3.5                                                                                       |
| 55259                 | CASC1                     |                                                               |                                                                                                |
| 80129                 | <b>CCDC170</b>            | -0.4                                                          | 0.2; 2.1; 42.0                                                                                 |
| 1952                  | CELSR2                    |                                                               | -11.1; -9.4; -7.7; -3.6; -0.9; 0.7; 1.8; 3.0; 5.7; 13.7                                        |
| 3572                  | <b>IL6ST</b>              | -44.9; -34.6; -24.7; -8.9; -0.3; 2.4                          | -35.2; -30.6; -18.6; -0.5; 0.08; 33.1                                                          |
| 26018                 | <b>LRIG1</b>              | 1.9; 4.1; 8.1; 14.5; 18.2; 19.8; 22.2; 24.7; 31.2; 37.1; 39.9 | 1.9; 16.9; 23.0; 24.8; 26.6; 27.9; 30.8; 37.2; 41.5                                            |
| 83450                 | <b>LRRC48</b>             | 10.8; 15.7; 27.2                                              | 7.2; 10.9; 12.6                                                                                |
| 4137                  | MAPT                      |                                                               |                                                                                                |
| 9                     | <b>NAT1</b>               | -41.4; -1.1; -0.1; 9.1                                        | 9.5; 27.7; 42.3                                                                                |
| 26166                 | RGS22                     |                                                               | -17.9                                                                                          |
| 57758                 | SCUBE2                    |                                                               | -0.4; 0.4                                                                                      |
| 256394                | SERPINA11                 |                                                               | 0.0; 2.4                                                                                       |
| 6478                  | <b>SIAH2</b>              | 6.7; 18.6; 26.4                                               | -23.3; -10.3; -7.3; -6.2; -4.1; -2.7; -0.5; 5.5; 6.7; 11.4; 12.1; 15.0; 15.9; 19.9; 24.9; 26.0 |
| 203328                | SUSD3                     | -9.1; 15.0                                                    | -39.2; -32.8; -5.0; 1.5; 13.8                                                                  |
| 285386                | TPRG1                     | -50.4                                                         | -44.5; 1.9                                                                                     |
| 51364                 | ZMYND10                   |                                                               |                                                                                                |
